# Supplementary material for: Monocytes maintain central nervous system homeostasis following helminth-induced inflammation
Source: PubMed Central journal article supplement — Proc Natl Acad Sci U S A. 2022 Sep 7;119(37):e2201645119. doi: 10.1073/pnas.2201645119 (PMC9478671; doi:10.1073/pnas.2201645119), 2022-09-07
Supplement: pnas.2201645119.sapp.pdf [file pnas.2201645119.sapp.pdf]

## Supporting Information for:

### Monocytes maintain central nervous system homeostasis following helminth-induced inflammation.

Jianya Peng<sup>a,b,1</sup>, Chandler B. Sy<sup>a,b,1</sup>, John J. Ponessa<sup>a,b</sup>, Alexander D. Lemenze<sup>c</sup>, Christina M. Hernandez<sup>a,b</sup>, Juan M. Inclan-Rico<sup>a,b</sup>, Arman Sawhney<sup>a</sup>, Hannah G. Federman<sup>a,b</sup>, Krupa Chavan<sup>a,b</sup>, Vanessa Espinosa<sup>a,e</sup>, Sergei V. Kotenko<sup>a,d</sup>, Amariliz Rivera<sup>a,e</sup>, and Mark C. Siracusa<sup>a,b,2</sup>

<sup>a</sup> Center for Immunity and Inflammation, <sup>b</sup>Department of Medicine, <sup>c</sup>Department of Pathology, Immunology and Laboratory Medicine, <sup>d</sup>Department of Microbiology, Biochemistry and Molecular Genetics, <sup>e</sup>Department of Pediatrics, New Jersey Medical School, Rutgers-The State University of New Jersey, Newark, New Jersey, USA.

<sup>1</sup>These authors contributed equally to this work.<sup>2</sup>To whom correspondence may be addressed. Email: mark.siracusa@rutgers.edu

Running title: Helminth-induced monocytes prevent neuroinflammation.

#### This PDF file includes:

Figure S1 to S6  
Table S1  
QuantiTech primer assay information

Supplement 1

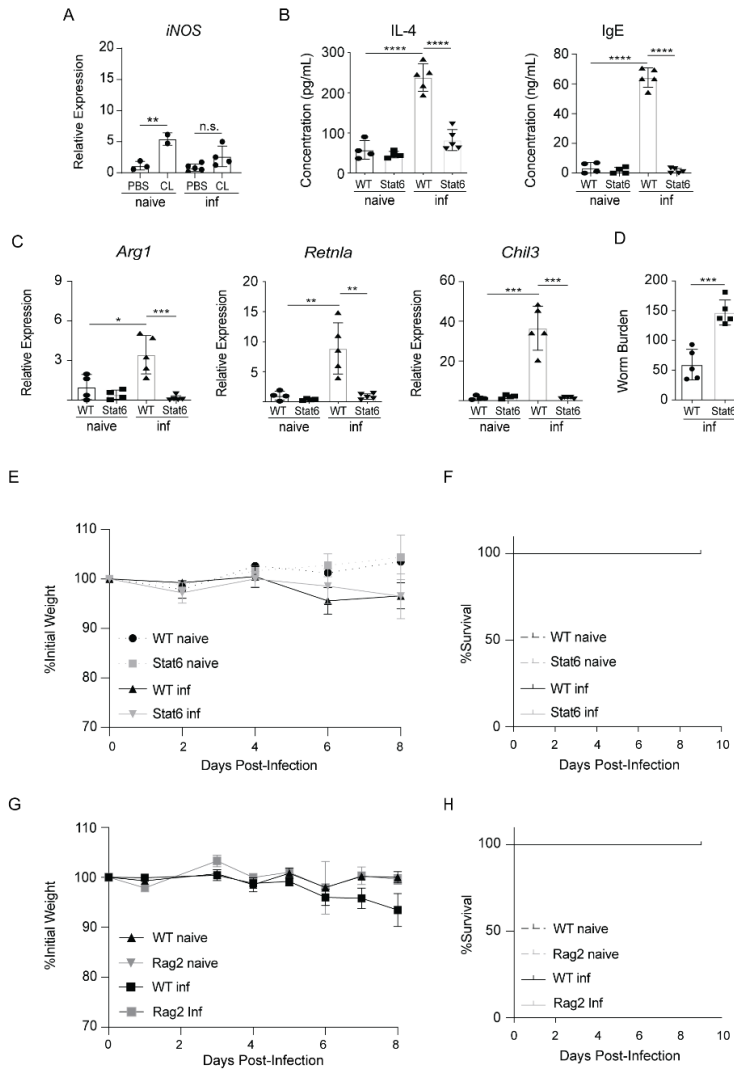

**Figure S1: Type 2 cytokine responses and adaptive immunity are not required for host survival post-*Trichinella spiralis* infection.** (A) *iNOS* expression levels in the intestine were determined in naive and *T. spiralis* infected animals that were treated with PBS- or clodronate-loaded (CL) liposomes. Results are representative of at least 2 independent experiments with at least 3 biological replicates for test groups and 2-3 biological replicates for naive controls. Wild type (WT) or STAT6KO (Stat6) mice were infected with *T. spiralis* and sacrificed on 8 days post-infection (dpi). Mesenteric lymph node (mLN) cells were stimulated with anti-CD3 and anti-CD28 for 72 hours. (B) IL-4 levels from the supernatants of stimulated mLN cells and IgE levels from the plasma (1:50 dilution) were evaluated via ELISA. (C) Intestinal expression of M2-associated markers was evaluated via RT-qPCR. (D) Intestinal worm burden was evaluated. (E) Weights and (F) mortality were tracked throughout the course of the infection. WT or RAG2KO (Rag2) mice were infected with *T. spiralis* and sacrificed on 8 dpi. (G) Weights and (H) mortality were tracked throughout the course of the infection. All panels involving STAT6KO mice are representative of at least 3 independent experiments with at least 3 biological replicates per group per experiment. Statistical analysis was performed using Student's t-test. \*,  $p < 0.05$ ; \*\*,  $p < 0.01$ ; \*\*\*,  $p < 0.001$ ; \*\*\*\*,  $p < 0.0001$ ; n.s., not significant. For panel (G), statistics are comparing WT inf to Rag2KO inf. Error bars represent  $\pm$ SD. inf, *T. spiralis*-infected.

Supplement 2

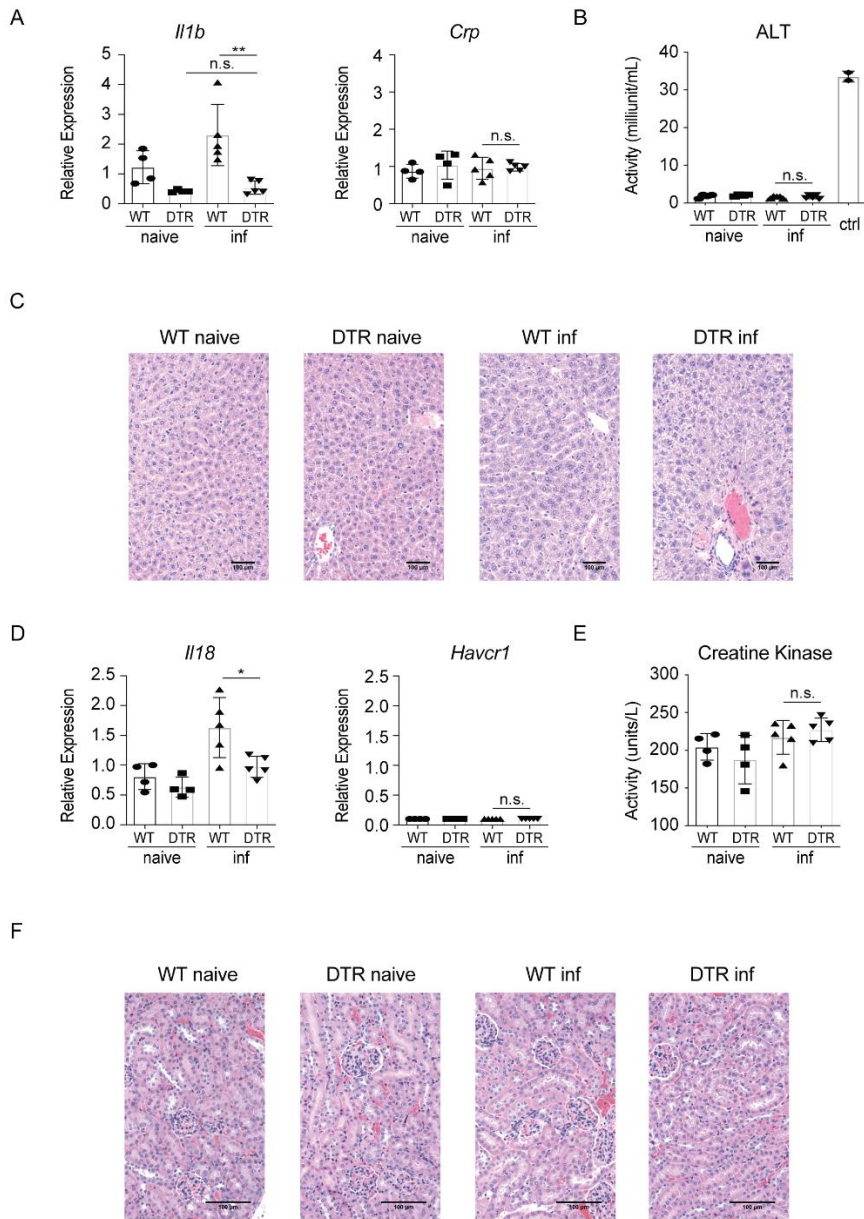

**Figure S2: Increased morbidity and mortality exhibited by monocyte-depleted mice following *T. spiralis* infection are not due to liver or kidney injury or dysfunction.** Wild type (WT) and CCR2-DTR (DTR) mice were infected with *T. spiralis* and treated with diphtheria toxin (DT) intraperitoneally every other day. Mice were sacrificed 8 dpi. **(A)** RNA was extracted from liver tissue, and expression of markers associated with liver injury were evaluated via RT-qPCR. **(B)** Plasma levels of alanine aminotransferase (ALT) were quantified. **(C)** H&E staining of liver sections. **(D)** RNA was extracted from kidney tissue, and expression of markers associated with kidney injury were evaluated via RT-qPCR. **(E)** Plasma levels of creatine kinase were quantified. **(F)** H&E staining of kidney sections. Results are representative of at least 2 independent experiments with at least 3 biological replicates per group per experiment. Statistical analysis was performed using Student's t-test. \*,  $p < 0.05$ ; \*\*,  $p < 0.01$ ; n.s., not significant. Error bars represent  $\pm$ SD. inf, *T. spiralis*-infected; ctr, positive control.

Supplement 3

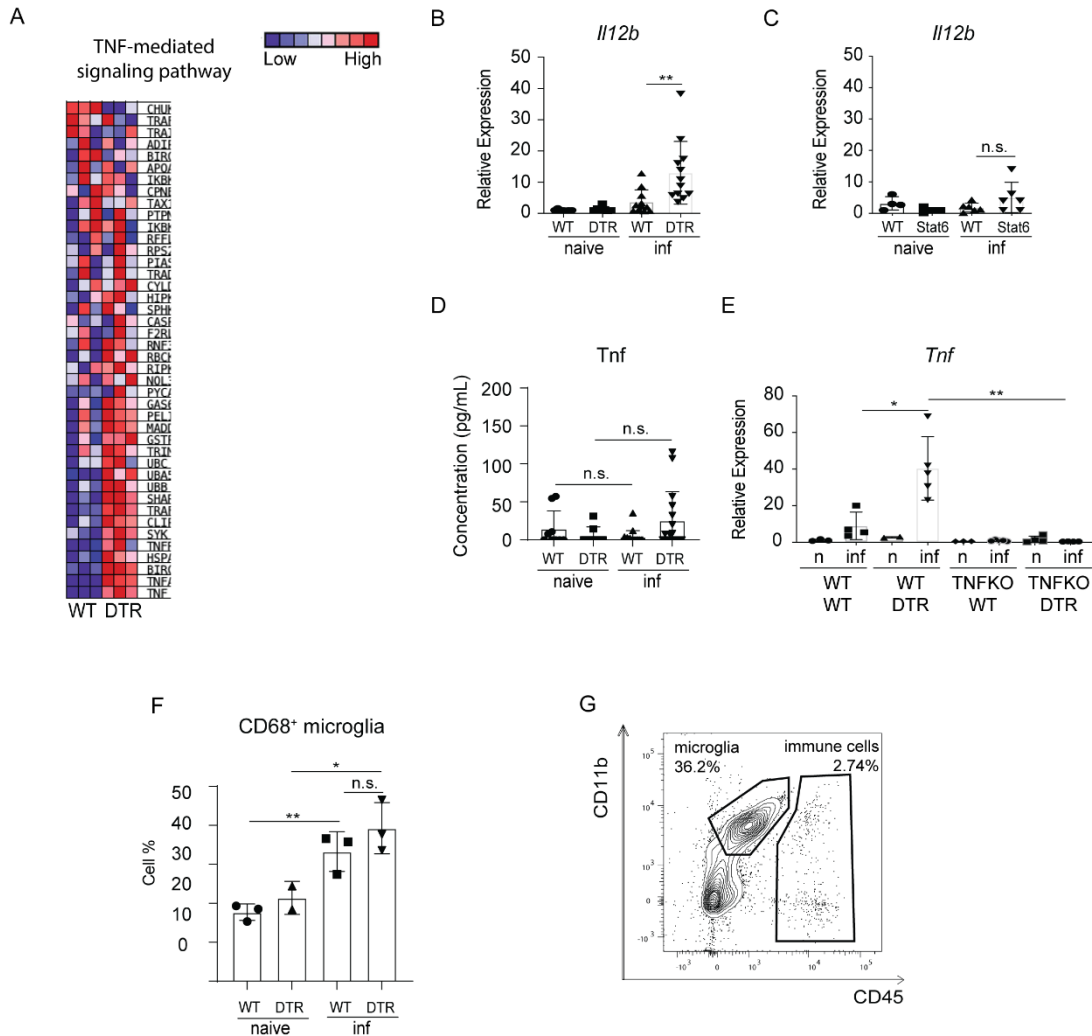

**Figure S3: Loss of CCR2<sup>+</sup> monocytes results in a proinflammatory signature in the brain.** Wild type (WT), monocyte-depleted (DTR), STAT6KO (Stat6), TNFKO, and monocyte-depleted TNFKO mice (TNFKO DTR) mice were infected with *T. spiralis*. Mice were sacrificed 8 dpi. **(A)** Gene sequencing enrichment analysis (GSEA) heat map for TNF-mediated signaling pathway comparing infected WT and infected DTR mice. RNA was extracted from whole brain, and *Il12b* expression was evaluated in **(B)** monocyte-depleted and **(C)** STAT6KO mice compared to control mice following infection. **(D)** Serum TNF from naive and infected WT and DTR mice was measured by ELISA (pooled from 4 independent experiments). **(E)** RNA was extracted from the whole brains of WT, DTR, TNFKO, and TNFKO DTR mice following infection, and *Tnf* expression was evaluated via RT-qPCR. **(F)** CD68 expression levels were evaluated by flow cytometric analysis on microglia from naive and infected WT and monocyte-deplete mice. **(G)** Gating strategy of microglia (CD45<sup>mid</sup>CD11b<sup>+</sup>) compared to immune cells (CD45<sup>hi</sup>). Results are representative of at least 2 independent experiments with at least 3 biological replicates for test groups and 2-3 biological replicates for naive controls. Statistical analysis was performed using Student's t-test. \*, p < 0.05; \*\*, p < 0.01; n.s., not significant. Error bars represent SD. inf, *T. spiralis*-infected. n, naive.

Supplement 4

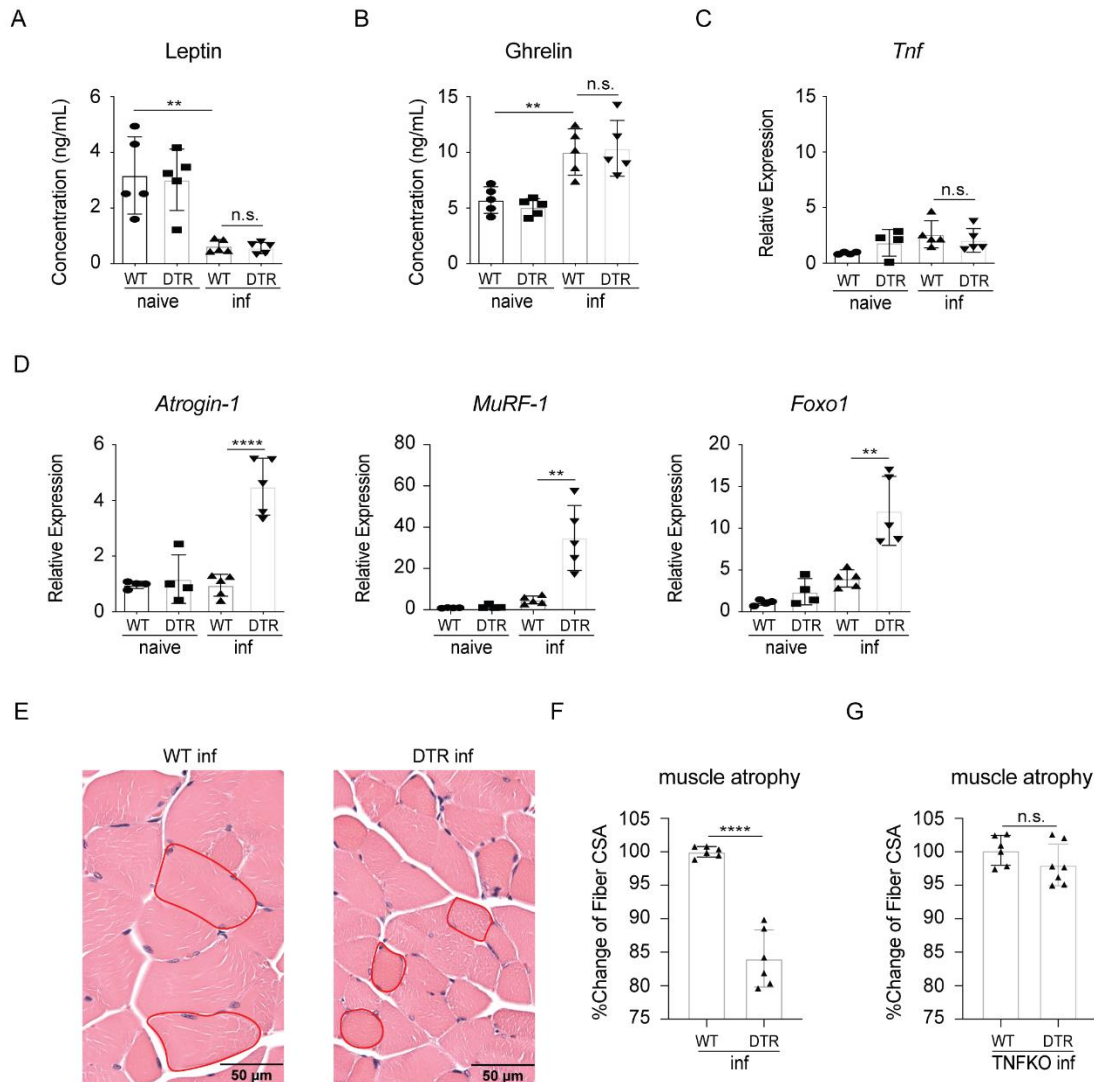

**Figure S4: Expression of proinflammatory cytokines in the brain is associated with muscle atrophy.**

Wild type (WT) or CCR2-DTR (DTR) mice were treated with diphtheria toxin intraperitoneally every other day and sacrificed 8 dpi. Plasma (A) leptin and (B) ghrelin levels were evaluated. RNA from gastrocnemius tissue was extracted, and expression of (C) proinflammatory- and (D) atrophy-associated markers were evaluated via RT-qPCR. H&E staining of gastrocnemius tissue was evaluated via (E) microscopy and (F) cross-sectional areas (CSA) was quantified. Representative muscle fibers are encircled in red. (G) The CSA of gastrocnemius muscle fibers was quantified in infected TNFKO mice. Panels are representative of at least 3 independent experiments with at least 3 biological replicates per group per experiment. Statistical analysis was performed using Student's t-test. \*\*,  $p < 0.01$ ; \*\*\*\*,  $p < 0.0001$ ; n.s., not significant. Error bars represent SD. inf, *T. spiralis*-infected.

Supplement 5

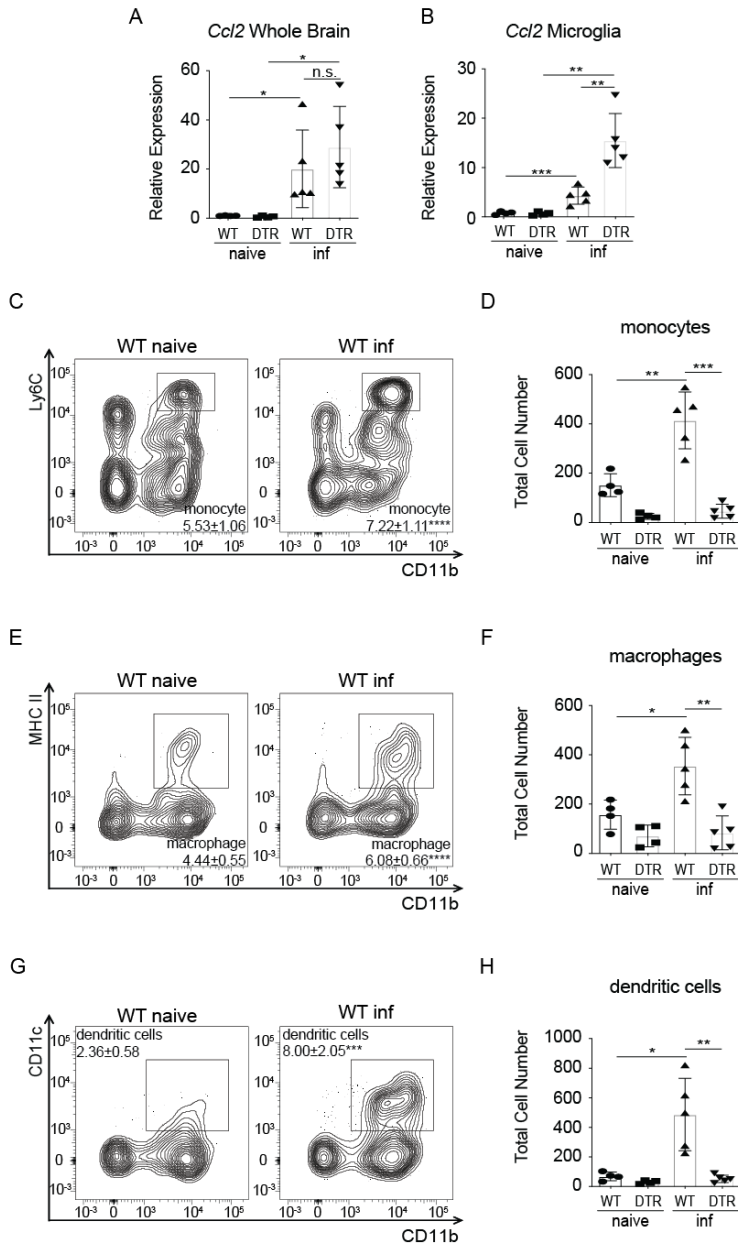

**Figure S5: CCR2<sup>+</sup> monocyte populations increase in the brain following *Trichinella* infection.** wild type (WT) or DTR mice were treated with DT (i.p.) every other day and sacrificed 8 dpi. RNA from **(A)** whole brain or **(B)** sort-purified microglia was extracted, and expression of *Ccl2* was evaluated via RT-qPCR reaction. Single cell suspensions were generated from brain tissue and evaluated via flow cytometry. Gating strategy and total cell number of **(C,D)** monocytes (CD3<sup>+</sup>CD19<sup>+</sup>Ly6G<sup>+</sup>MHCII<sup>+</sup>CD11c<sup>+</sup> cells) **(E,F)** macrophages (gated on CD3<sup>+</sup>CD19<sup>+</sup>Ly6G<sup>+</sup>CD11c<sup>+</sup> cells), and **(G,H)** dendritic cells (gated on CD3<sup>+</sup>CD19<sup>+</sup>Ly6G<sup>+</sup> cells). Numbers in cytometry plots represent mean percentages (±SD) of cells out of CD45<sup>hi</sup> cells, and statistics are comparing WT naive and WT *T. spiralis*-infected mice. All panels are representative of at least 3 independent experiments with at least 3 biological replicates per group per experiment. Statistical analysis was performed using Student's t-test. \*, p < 0.05; \*\*, p < 0.01; \*\*\*, p < 0.001; \*\*\*\*, p < 0.0001; n.s., not significant. Error bars represent ±SD. inf, *T. spiralis*-infected.

Supplement 6

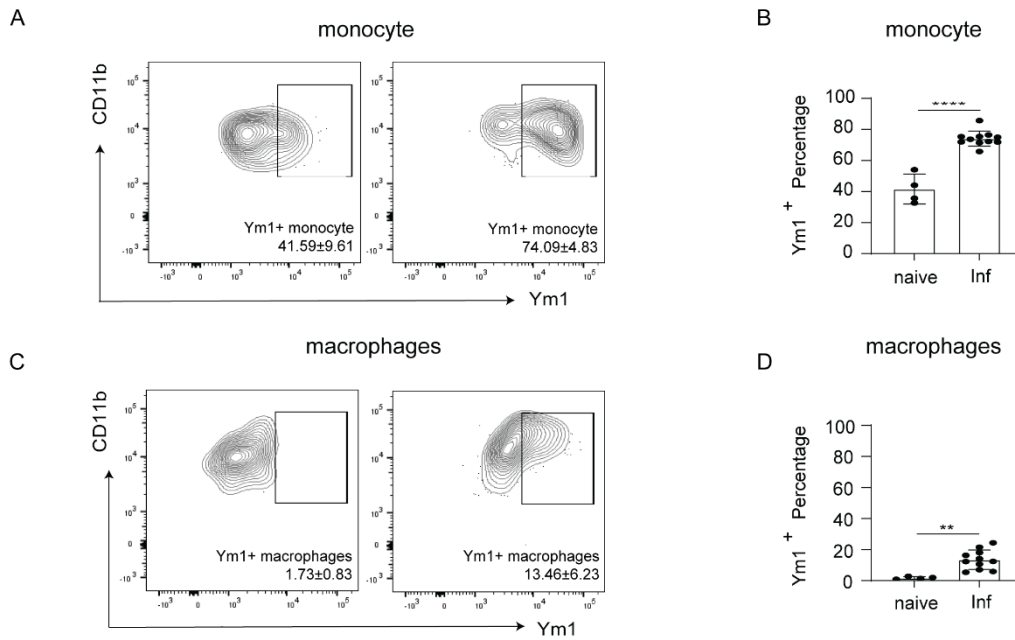

**Figure S6: Intracellular staining of Ym1 in infected mouse brain. (A)** Representative gating of intracellular staining of Ym1 in brain monocytes from infected WT mice 8 dpi. **(B)** Ym1<sup>+</sup> monocyte percentage in brains of infected WT mice 8 dpi. **(C)** Representative gating of intracellular staining of Ym1 in WT infected brain macrophages 8 dpi. **(D)** Ym1<sup>+</sup> macrophage percentage in brains of infected WT mice 8 dpi. Results are representative of at least 2 independent experiments with at least 3 biological replicates per group per experiment. Statistical analysis was performed using Student's t-test. \*,  $p < 0.05$ ; \*\*,  $p < 0.01$ ; n.s., not significant. Error bars represent SD. inf, *T. spiralis*-infected.

**Table 1: Upregulated (green, fold change > 1.5) and downregulated (red, fold change < -1.5) genes in infected wild type versus infected monocyte-depleted mice.**

| Name          | ENSEMBL             | Log <sub>2</sub> fold change | Fold change | FDR p-value |
|---------------|---------------------|------------------------------|-------------|-------------|
| Ear2          | ENSMUSG00000072596  | 5.304526                     | 39.52042    | 7.37E-10    |
| Fam205a3      | ENSMUSG00000093996  | 5.005028                     | 32.11173    | 3.94E-10    |
| Gm26718       | ENSMUSG00000097367  | 3.269005                     | 9.63981     | 1.29E-05    |
| Gm6436        | ENSMUSG00000061330  | 3.231516                     | 9.392544    | 0.029057    |
| H2-Aa         | ENSMUSG00000036594  | 2.935299                     | 7.649147    | 0           |
| Ccr2          | ENSMUSG00000049103  | 2.770431                     | 6.823118    | 0           |
| H2-Eb1        | ENSMUSG00000060586  | 2.762616                     | 6.786255    | 0           |
| Sirpb1c       | ENSMUSG00000074677  | 2.670894                     | 6.368236    | 0.001775    |
| H2-Ab1        | ENSMUSG00000073421  | 2.577319                     | 5.968296    | 0           |
| Chil3         | ENSMUSG00000040809  | 2.304529                     | 4.940062    | 1.63E-09    |
| Gm48283       | ENSMUSG000000114436 | 2.297991                     | 4.917724    | 0.000312    |
| Gm11427       | ENSMUSG00000083161  | 2.249898                     | 4.756491    | 0.008457    |
| Gm26964       | ENSMUSG00000098196  | 2.101937                     | 4.292852    | 0.023004    |
| Plbd1         | ENSMUSG00000030214  | 2.025178                     | 4.070421    | 4.65E-09    |
| Gm15929       | ENSMUSG00000086032  | 1.954938                     | 3.876994    | 0.001204    |
| F10           | ENSMUSG00000031444  | 1.890935                     | 3.708755    | 0.009371    |
| Ccr7          | ENSMUSG00000037944  | 1.656662                     | 3.152862    | 0.001896    |
| Retnla        | ENSMUSG00000061100  | 1.449134                     | 2.730442    | 1.31E-05    |
| Cd74          | ENSMUSG00000024610  | 1.280404                     | 2.42907     | 0           |
| Gm10645       | ENSMUSG00000074228  | 1.153722                     | 2.224871    | 4.47E-05    |
| Plac8         | ENSMUSG00000029322  | 1.05925                      | 2.083848    | 0.039914    |
| Spn           | ENSMUSG00000051457  | 1.017955                     | 2.025047    | 0.035097    |
| 1700016P03Rik | ENSMUSG00000085609  | 0.876306                     | 1.835669    | 1.9E-06     |
| Mgl2          | ENSMUSG00000040950  | 0.799879                     | 1.740955    | 0.01748     |
| Gm42047       | ENSMUSG000000110631 | 0.774176                     | 1.710212    | 2.6E-05     |
| Xlr3b         | ENSMUSG00000073125  | 0.756189                     | 1.689023    | 2.41E-07    |
| Btg2          | ENSMUSG00000020423  | 0.737627                     | 1.667431    | 1.14E-08    |
| Tsc22d2       | ENSMUSG00000027806  | 0.729865                     | 1.658484    | 0           |
| Npas4         | ENSMUSG00000045903  | 0.679316                     | 1.60138     | 0.000333    |
| Hba-a1        | ENSMUSG00000069919  | 0.653162                     | 1.572611    | 1.6E-06     |
| Arc           | ENSMUSG00000022602  | 0.632251                     | 1.549981    | 4.17E-07    |
| Ctla2a        | ENSMUSG00000044258  | -0.585563                    | -1.500624   | 0.021471    |
| Tgm2          | ENSMUSG00000037820  | -0.586866                    | -1.50198    | 1.46E-05    |
| Relb          | ENSMUSG00000002983  | -0.590557                    | -1.505828   | 0.000128    |
| Vwf           | ENSMUSG00000001930  | -0.597701                    | -1.513303   | 0.003516    |
| Sfn2          | ENSMUSG00000072620  | -0.60057                     | -1.516315   | 0.030876    |
| Ikbke         | ENSMUSG00000042349  | -0.600756                    | -1.516511   | 0.038138    |
| Bcl2a1b       | ENSMUSG00000089929  | -0.60232                     | -1.518156   | 0.010206    |
| Ncf4          | ENSMUSG00000071715  | -0.604757                    | -1.520723   | 0.043844    |
| Cxcl16        | ENSMUSG00000018920  | -0.608435                    | -1.524604   | 5.72E-05    |



|         |                    |           |           |          |
|---------|--------------------|-----------|-----------|----------|
| Grrp1   | ENSMUSG00000050105 | -0.612446 | -1.52885  | 0.010562 |
| Pim1    | ENSMUSG00000024014 | -0.627263 | -1.544632 | 0.00239  |
| Adm     | ENSMUSG00000030790 | -0.638448 | -1.556654 | 0.029484 |
| Gadd45b | ENSMUSG00000015312 | -0.638487 | -1.556696 | 1.49E-11 |
| Lcp2    | ENSMUSG00000002699 | -0.639582 | -1.557878 | 1.06E-05 |
| Slc4a11 | ENSMUSG00000074796 | -0.64871  | -1.567766 | 0.015759 |
| Fkbp5   | ENSMUSG00000024222 | -0.648825 | -1.567891 | 3.32E-07 |
| Acer2   | ENSMUSG00000038007 | -0.652691 | -1.572098 | 0.003507 |
| Socs3   | ENSMUSG00000053113 | -0.653012 | -1.572448 | 0.000355 |
| Plin4   | ENSMUSG00000002831 | -0.669275 | -1.590274 | 8.53E-05 |
| Gm2260  | ENSMUSG00000098428 | -0.674341 | -1.595868 | 0.046934 |
| Slc15a3 | ENSMUSG00000024737 | -0.675015 | -1.596613 | 2.03E-06 |
| Nfkbia  | ENSMUSG00000021025 | -0.67917  | -1.601218 | 9.17E-08 |
| Igsf6   | ENSMUSG00000035004 | -0.688357 | -1.611448 | 0.018079 |
| Galnt15 | ENSMUSG00000021903 | -0.688406 | -1.611502 | 2.7E-05  |
| Fas     | ENSMUSG00000024778 | -0.705039 | -1.630189 | 0.001848 |
| H2-Q6   | ENSMUSG00000073409 | -0.706413 | -1.631742 | 0.002954 |
| C5ar1   | ENSMUSG00000049130 | -0.713506 | -1.639784 | 1.53E-06 |
| Sh3tc1  | ENSMUSG00000036553 | -0.721401 | -1.648783 | 0.000792 |
| Xdh     | ENSMUSG00000024066 | -0.726106 | -1.654168 | 0.001513 |
| Alox5   | ENSMUSG00000025701 | -0.731389 | -1.660237 | 0.012351 |
| Cdkn1a  | ENSMUSG00000023067 | -0.737348 | -1.667109 | 9.2E-09  |
| Birc3   | ENSMUSG00000032000 | -0.742136 | -1.67265  | 1.85E-06 |
| Ier3    | ENSMUSG00000003541 | -0.742495 | -1.673066 | 4.55E-08 |
| Runx1   | ENSMUSG00000022952 | -0.798933 | -1.739814 | 6.02E-08 |
| Srarp   | ENSMUSG00000070637 | -0.801233 | -1.74259  | 0.045678 |
| Cxcl10  | ENSMUSG00000034855 | -0.807935 | -1.750704 | 0.009536 |
| Map3k6  | ENSMUSG00000028862 | -0.839294 | -1.789174 | 0.000171 |
| Ifitm1  | ENSMUSG00000025491 | -0.860342 | -1.815469 | 0.003022 |
| Tnfaip2 | ENSMUSG00000021281 | -0.878738 | -1.838766 | 1.13E-07 |
| Nlrp3   | ENSMUSG00000032691 | -0.908906 | -1.877621 | 9.02E-05 |
| Scn10a  | ENSMUSG00000034533 | -0.908939 | -1.877664 | 0.022408 |
| Tlr2    | ENSMUSG00000027995 | -0.910471 | -1.879659 | 1.33E-11 |
| Maff    | ENSMUSG00000042622 | -0.934081 | -1.910673 | 1.52E-06 |
| Ch25h   | ENSMUSG00000050370 | -0.935144 | -1.912082 | 0.002509 |
| Bcl3    | ENSMUSG00000053175 | -0.943843 | -1.923646 | 1.18E-05 |
| Ccl3    | ENSMUSG00000000982 | -0.967297 | -1.955174 | 0.004901 |
| Nfkbie  | ENSMUSG00000023947 | -0.997374 | -1.996363 | 1.85E-06 |
| Fgr     | ENSMUSG00000028874 | -0.998523 | -1.997954 | 0.012361 |
| Rab20   | ENSMUSG00000031504 | -1.003711 | -2.005151 | 0.003347 |
| Ccl12   | ENSMUSG00000035352 | -1.005073 | -2.007045 | 2.84E-07 |
| Gm26508 | ENSMUSG00000097614 | -1.045895 | -2.064648 | 0.002183 |
| Lrg1    | ENSMUSG00000037095 | -1.058826 | -2.083236 | 2.12E-06 |
| Gpr84   | ENSMUSG00000063234 | -1.060232 | -2.085267 | 7.37E-10 |
| Ccl2    | ENSMUSG00000035385 | -1.062011 | -2.08784  | 0.000728 |

|               |                     |           |           |          |
|---------------|---------------------|-----------|-----------|----------|
| Tmem252       | ENSMUSG00000048572  | -1.108489 | -2.156198 | 3.81E-05 |
| Tnfaip3       | ENSMUSG00000019850  | -1.118203 | -2.170763 | 0        |
| Hrct1         | ENSMUSG00000071001  | -1.144907 | -2.211318 | 0.009134 |
| Ccl7          | ENSMUSG00000035373  | -1.145499 | -2.212226 | 0.035223 |
| Batf          | ENSMUSG00000034266  | -1.160242 | -2.23495  | 0.007694 |
| Ccl4          | ENSMUSG00000018930  | -1.177159 | -2.261311 | 0.000853 |
| Icam1         | ENSMUSG00000037405  | -1.198012 | -2.294234 | 0        |
| Ii1a          | ENSMUSG00000027399  | -1.257676 | -2.391103 | 4.29E-11 |
| Slamf8        | ENSMUSG00000053318  | -1.333755 | -2.520579 | 0.000151 |
| 8430408G22Rik | ENSMUSG00000048489  | -1.355146 | -2.55823  | 2.41E-07 |
| Osm           | ENSMUSG00000058755  | -1.376904 | -2.597105 | 0.00111  |
| Lcn2          | ENSMUSG00000026822  | -1.396404 | -2.632446 | 0        |
| Gcat_2        | ENSMUSG000000116378 | -1.564348 | -2.957438 | 8.4E-06  |
| Ii1b          | ENSMUSG00000027398  | -1.598562 | -3.028412 | 1.52E-07 |
| Hcar2         | ENSMUSG00000045502  | -1.61907  | -3.07177  | 6.41E-07 |
| AL592169.1    | ENSMUSG000000116069 | -1.747376 | -3.357474 | 0.043938 |
| Acod1         | ENSMUSG00000022126  | -1.754791 | -3.374774 | 0.011074 |
| Retnlg        | ENSMUSG00000022651  | -1.79957  | -3.481163 | 0.012351 |
| Serpina3f     | ENSMUSG00000066363  | -1.803389 | -3.490392 | 0.001113 |
| Lao1          | ENSMUSG00000024903  | -1.805633 | -3.495825 | 0.007474 |
| Cd40          | ENSMUSG00000017652  | -1.814809 | -3.51813  | 2.52E-09 |
| Ii1rn         | ENSMUSG00000026981  | -1.823029 | -3.538233 | 3.47E-07 |
| Cd69          | ENSMUSG00000030156  | -1.982615 | -3.952088 | 0.041086 |
| S100a8        | ENSMUSG00000056054  | -2.083062 | -4.237054 | 0.000233 |
| AL732309.2    | ENSMUSG000000115074 | -2.301766 | -4.930609 | 0.02417  |
| S100a9        | ENSMUSG00000056071  | -2.307743 | -4.951079 | 6.85E-06 |
| Tnf           | ENSMUSG00000024401  | -2.446487 | -5.450872 | 0        |
| Cxcl2         | ENSMUSG00000058427  | -2.852437 | -7.222194 | 2.96E-09 |
| Ii12b         | ENSMUSG00000004296  | -2.901498 | -7.472016 | 0.028447 |
| Gm20441       | ENSMUSG00000092360  | -5.065622 | -33.48916 | 0.045595 |
| Ccr3          | ENSMUSG00000035448  | -6.214271 | -74.2475  | 0        |

**Table 1: Upregulated (green, fold change > 1.5) and downregulated (red, fold change < -1.5) genes in infected wild type versus infected monocyte-depleted mice.** Wild type and CCR2-DTR mice were infected with *T. spiralis* and treated with diphtheria toxin intraperitoneally every other day. Mice were sacrificed 8 days post-infection and brain tissue was harvested. Results are representative of 3 biological replicates per naive and infected group.

**QuantiTech primer assay information:**

| <b>Gene Target</b> | <b>SOURCE</b> | <b>IDENTIFIER</b> |
|--------------------|---------------|-------------------|
| <i>Actb</i>        | Qiagen        | Cat. # QT01136772 |
| <i>Tnf</i>         | Qiagen        | Cat. # QT00104006 |
| <i>Il1b</i>        | Qiagen        | Cat. # QT01048355 |
| <i>Il6</i>         | Qiagen        | Cat. # QT00098875 |
| <i>Il12b</i>       | Qiagen        | Cat. # QT00153643 |
| <i>Nlrp3</i>       | Qiagen        | Cat. # QT00122458 |
| <i>Arg1</i>        | Qiagen        | Cat. # QT00134288 |
| <i>Retnla</i>      | Qiagen        | Cat. # QT00254359 |
| <i>Chil3</i>       | Qiagen        | Cat. # QT00108829 |
| <i>Ear2</i>        | Qiagen        | Cat. # QT00265965 |
| <i>Mgl2</i>        | Qiagen        | Cat. # QT00143640 |
| <i>Foxo1</i>       | Qiagen        | Cat. # QT00116186 |
| <i>Fbxo32</i>      | Qiagen        | Cat. # QT00158543 |
| <i>Trim63</i>      | Qiagen        | Cat. # QT00291991 |
| <i>Ccl2</i>        | Qiagen        | Cat. # QT00167832 |
| <i>F10</i>         | Qiagen        | Cat. # QT02524935 |
| <i>Crp</i>         | Qiagen        | Cat. # QT00255444 |
| <i>Havcr1</i>      | Qiagen        | Cat. # QT00112427 |
| <i>Il18</i>        | Qiagen        | Cat. # QT00171129 |
